# Supplementary material
Source: JCI journal article supplement (doi:10.1172/jci139452)
Supplement: sd1 [file 1]

**Supplementary table 1.** Animal data and sample sizes

|                                       | Preterm<br>control | Beta-Ac<br>6h | 5d        | LPS       |           | LPS+<br>Beta | Term<br>control |
|---------------------------------------|--------------------|---------------|-----------|-----------|-----------|--------------|-----------------|
|                                       |                    |               |           | 16h       | 5d        |              |                 |
| n                                     | 7                  | 3             | 7         | 4         | 9         | 5            | 2               |
| n for sequencing                      | 4                  | 3             | 5         | 4         | 3         | 3            | 2               |
| Gestational age<br>at delivery (days) | 133 ± 2.4          | 133 ± 0.5     | 131 ± 1.9 | 131 ± 0.4 | 132 ± 1.1 | 131 ± 0.4    | 157 ± 0.5       |
| Fetal weight (g)                      | 331 ± 34           | 331 ± 9.9     | 338 ± 39  | 338 ± 45  | 327 ± 35  | 298 ± 40     | 514 ± 40        |
| Sex (M/F)                             | 6/2                | 2/1           | 3/4       | 2/2       | 5/4       | 1/4          | 1/1             |

**Supplementary table 2.** Organ weights, alveolar wash cell count, amniotic fluid cell count, leukocyte counts and differentials. \*p<0.05

|                                                    | Preterm control | LPS 5d      | LPS + Beta-Ac 5d |
|----------------------------------------------------|-----------------|-------------|------------------|
| Lung weight (g)                                    | 7.7 ± 1.0       | 9.2 ± 1.6*  | 8.7 ± 1.3        |
| Lung:Body weight ratio                             | 23.5 ± 3.2      | 28.4 ± 2.8* | 28.1 ± 3.4       |
| Thymus weight (g)                                  | 1.1 ± 0.3       | 1.0 ± 0.2   | 1.0 ± 0.3        |
| Thymus:Body weight ratio                           | 3.3 ± 0.8       | 3.0 ± 0.5   | 3.1 ± 0.5        |
| Cell count – alveolar wash (x10 <sup>4</sup> /mL)  | 3 ± 1.2         | 39 ± 14*    | 41 ± 14*         |
| Cell count – amniotic fluid (x10 <sup>4</sup> /mL) | 2 ± 2           | 28 ± 8*     | 37 ± 7*          |
| Maternal WBC (x10 <sup>9</sup> /L)                 | 8.2             | 5.6*        | 8.5              |
| Maternal neutrophils (%)                           | 78 ± 6          | 51 ± 16*    | 62 ± 8           |
| Fetal WBC (x10 <sup>9</sup> /L)                    | 2.4 ± 0.6       | 3.3 ± 0.8   | 4.2 ± 1.2*       |
| Fetal neutrophils (%)                              | 9.7 ± 6.1       | 23.3 ± 4.7* | 22.8 ± 4.3*      |

**Supplementary table 3.** Primary antibodies used for immunofluorescence staining.

| Antibody                                      | Species    | Catalog # | Company                    | Dilution |
|-----------------------------------------------|------------|-----------|----------------------------|----------|
| NKX2.1 <sup>1</sup>                           | Rabbit     | WRAB-1231 | Seven Hills Bioreagents    | 1:500    |
| NKX2.1 <sup>2</sup>                           | Guinea pig | G237      | In house                   | 1:200    |
| Pro-surfactant protein C (SFTPC) <sup>1</sup> | Rabbit     | WRAB-9337 | Seven Hills Bioreagents    | 1:100    |
| ABCA3 <sup>2</sup>                            | Guinea pig | GP985     | In house                   | 1:100    |
| Smooth muscle actin (SMA) <sup>3</sup>        | Mouse      | A5228     | Santa Cruz Biotechnologies | 1:2000   |
